# Supplementary material for: Development of the OPAL prediction model for prediction of live birth in couples with recurrent pregnancy loss: protocol for a prospective and retrospective cohort study in the Netherlands
Source: PubMed Central journal article supplement — BMJ Open. 2022 Sep 23;12(9):e062402. doi: 10.1136/bmjopen-2022-062402 (PMC9511582; doi:10.1136/bmjopen-2022-062402), 2022-09-23
Supplement: bmjopen-2022-062402.draft_revisions.pdf [file bmjopen-2022-062402.draft_revisions.pdf]

# BMJ Open

BMJ Open is committed to open peer review. As part of this commitment we make the peer review history of every article we publish publicly available.

When an article is published we post the peer reviewers' comments and the authors' responses online. We also post the versions of the paper that were used during peer review. These are the versions that the peer review comments apply to.

The versions of the paper that follow are the versions that were submitted during the peer review process. They are not the versions of record or the final published versions. They should not be cited or distributed as the published version of this manuscript.

BMJ Open is an open access journal and the full, final, typeset and author-corrected version of record of the manuscript is available on our site with no access controls, subscription charges or pay-per-view fees (<http://bmjopen.bmj.com>).

If you have any questions on BMJ Open's open peer review process please email [info.bmjopen@bmj.com](mailto:info.bmjopen@bmj.com)

# BMJ Open

## Predicting pregnancy success in couples with Recurrent Pregnancy Loss: Study protocol of the OPAL-prediction model

|                               |                                                                                                                                                                                                                                                                                                                                                                                                                                                                                                                                                                                                                                                                                                                                                                                                                                                                                                                                                                                                                                                                                                                                                                                                                                                                                                                                                                                                                                                  |
|-------------------------------|--------------------------------------------------------------------------------------------------------------------------------------------------------------------------------------------------------------------------------------------------------------------------------------------------------------------------------------------------------------------------------------------------------------------------------------------------------------------------------------------------------------------------------------------------------------------------------------------------------------------------------------------------------------------------------------------------------------------------------------------------------------------------------------------------------------------------------------------------------------------------------------------------------------------------------------------------------------------------------------------------------------------------------------------------------------------------------------------------------------------------------------------------------------------------------------------------------------------------------------------------------------------------------------------------------------------------------------------------------------------------------------------------------------------------------------------------|
| Journal:                      | <i>BMJ Open</i>                                                                                                                                                                                                                                                                                                                                                                                                                                                                                                                                                                                                                                                                                                                                                                                                                                                                                                                                                                                                                                                                                                                                                                                                                                                                                                                                                                                                                                  |
| Manuscript ID                 | bmjopen-2022-062402                                                                                                                                                                                                                                                                                                                                                                                                                                                                                                                                                                                                                                                                                                                                                                                                                                                                                                                                                                                                                                                                                                                                                                                                                                                                                                                                                                                                                              |
| Article Type:                 | Protocol                                                                                                                                                                                                                                                                                                                                                                                                                                                                                                                                                                                                                                                                                                                                                                                                                                                                                                                                                                                                                                                                                                                                                                                                                                                                                                                                                                                                                                         |
| Date Submitted by the Author: | 28-Feb-2022                                                                                                                                                                                                                                                                                                                                                                                                                                                                                                                                                                                                                                                                                                                                                                                                                                                                                                                                                                                                                                                                                                                                                                                                                                                                                                                                                                                                                                      |
| Complete List of Authors:     | <p>Youssef, Angelos; Leiden University Medical Center, Obstetrics and Gynaecology<br/> van der Hoorn, Marie-Louise; Leiden University Medical Center, Gynaecology and obstetrics<br/> van Eekelen, Rik; Amsterdam UMC Location AMC, Obstetrics and Gynaecology, Centre for Reproductive Medicine, Amsterdam Reproduction and Development Research Institute<br/> van Geloven, Nan; Leiden University Medical Center, Department of Biomedical Data Sciences<br/> van Wely, Madelon; Amsterdam UMC Location AMC, Obstetrics and Gynaecology, Centre for Reproductive Medicine, Amsterdam Reproduction and Development Research Institute, Amsterdam University Medical Centers, location Academic Medical Centre<br/> Smits, Myrthe A.J.; Amsterdam UMC Location AMC, Obstetrics and Gynaecology, Centre for Reproductive Medicine, Amsterdam Reproduction and Development Research Institute, Amsterdam University Medical Centers, location Academic Medical Centre<br/> Mulders, Annemarie; Erasmus Medical Center, Obstetrics and Gynaecology<br/> van Lith, Jan; Leiden University Medical Center, Obstetrics and Gynaecology<br/> Goddijn, Mariëtte; Amsterdam UMC Location AMC, Obstetrics and Gynaecology, Centre for Reproductive Medicine, Amsterdam Reproduction and Development Research Institute, Amsterdam University Medical Centers, location Academic Medical Centre<br/> Lashley, Eileen; Leiden University Medical Center</p> |
| Keywords:                     | Reproductive medicine < GYNAECOLOGY, Maternal medicine < OBSTETRICS, EPIDEMIOLOGY                                                                                                                                                                                                                                                                                                                                                                                                                                                                                                                                                                                                                                                                                                                                                                                                                                                                                                                                                                                                                                                                                                                                                                                                                                                                                                                                                                |
|                               |                                                                                                                                                                                                                                                                                                                                                                                                                                                                                                                                                                                                                                                                                                                                                                                                                                                                                                                                                                                                                                                                                                                                                                                                                                                                                                                                                                                                                                                  |

SCHOLARONE™  
Manuscripts

# Predicting pregnancy success in couples with Recurrent Pregnancy Loss: Study protocol of the OPAL-prediction model

Angelos Youssef<sup>1, \*</sup>, Marie-Louise P. van der Hoorn<sup>1</sup>, Rik van Eekelen<sup>2</sup>, Nan van Geloven<sup>3</sup>, Madelon van Wely<sup>2</sup>, Myrthe A.J. Smits<sup>2</sup>, A.G.M.G.J. Mulders<sup>4</sup>, Jan M.M. van Lith<sup>1</sup>, Mariëtte Goddijn<sup>2</sup>, Eileen E.L.O. Lashley<sup>1</sup>

<sup>1</sup> Obstetrics and Gynaecology, Leiden University Medical Center, the Netherlands

<sup>2</sup> Obstetrics and Gynaecology, Centre for Reproductive Medicine, Amsterdam Reproduction and Development Research Institute, Amsterdam University Medical Centers, location Academic Medical Centre, Amsterdam, the Netherlands

<sup>3</sup> Biomedical Data Sciences, Leiden University Medical Center, Leiden, The Netherlands

<sup>4</sup> Obstetrics and Gynaecology, Erasmus Medical Center, the Netherlands

\* Correspondence to: Angelos Youssef, [A.Youssef@LUMC.nl](mailto:A.Youssef@LUMC.nl); Albinusdreef 2, 2333 ZA, Leiden, The Netherlands;

## ABSTRACT

### Introduction

Recurrent pregnancy loss (RPL) is defined as the loss of two or more conceptions before the 24<sup>th</sup> week of gestation. Despite extensive diagnostic work-up, in only 25-40% an underlying cause is identified. Several factors may increase the risk for miscarriage, but the chance of a normal, successful pregnancy is still high. Prognostic counselling therefore plays a significant role in supporting couples with RPL. The main limitation in currently available prediction models is the lack of a sufficiently large cohort, adjustment for relevant risk factors such that prognoses are individualized, and separation between the cumulative live birth rate and the chance that the next conception will lead to a live birth. In this project, we therefore aim to make an optimal and individualized prognosis for the future chance of pregnancy success which could lead to improved wellbeing and the ability managing reproductive choices.

### Methods and analysis

We will include both prospectively as retrospectively, a cohort of at least 931 couples with RPL who have visited one of the three participating university hospitals in the Netherlands for intake. General medical and obstetric history will be collected, as well as reports of pregnancies after the initial consultation. Multiple imputation will be performed to cope for missing data. A Cox proportional hazards model for time to pregnancy will be developed to estimate the chance of a live birth within three years after intake. To dynamically estimate the chance of a live birth, given the outcome of a pregnancy after intake, a logistic regression model will be developed for the binary outcome live birth.

### Ethics and dissemination

The Medical Ethical Research Committee of the Leiden University Medical Center approved this study protocol. There are no risks or burden associated with this study. Findings will be published in peer-reviewed journals and presentations at international conferences.

### Trial registration number

NCT05167812

### Key Words

Recurrent pregnancy loss, prediction model, prognostic tool

## ARTICLE SUMMARY

### Strengths and limitations of this study

- First large multicenter prospective study to develop a prognostic model that estimates the chance of a live birth within three years in couples with RPL.
- Logistic regression model enables dynamically updating live birth chances given the outcome of pregnancies after intake
- First study to predict pregnancy complications in RPL couples

- Large cohort used for the development of a robust model, using the PROBAST tool as a guide to control bias
- Retrospective cohort is prone to response and recall bias
- Primary prediction model will not be able to distinguish between different associated RPL factors

## INTRODUCTION

Recurrent pregnancy loss (RPL) is defined as the loss of two or more conceptions before 24 weeks of gestation (1). This condition affects approximately 1-3% of all fertile couples (2, 3). RPL is a highly heterogeneous condition with multiple known maternal risk factors, varying from auto-immune diseases (antiphospholipid syndrome (APS), antithyroid antibodies), parental balanced chromosomal translocations and congenital uterine abnormalities to advanced maternal age, maternal smoking and alcohol consumption. Besides these maternal factors, a potential contribution of paternal factors (such as male age, lifestyle factors and DNA fragmentation) has been recognized to add to the risk for miscarriages (4-6).

Despite extensive diagnostic work-up offered to couples with RPL, underlying risk factors can be identified in only 25-40% of couples (7, 8). Limited understanding of mechanisms underlying RPL has the consequence that effective treatment options are often lacking. When no evidence-based therapeutic options are available for couples with RPL, clinical management is primarily focused on providing supportive care. Supportive care and intensive pregnancy surveillance in the first weeks of gestation are assumed to be of influence in the prevention of new pregnancy loss (9).

Part of this supportive care is counselling on the prognosis and live birth rate of subsequent pregnancies in couples with RPL. Recently we conducted a systematic search to identify and assess the methodological quality of existing prediction models [Youssef et al, submitted for Fertility and Sterility 2021]. This review included the two most frequently used models which provide an estimate of subsequent chance of ongoing pregnancy/live birth in couples with unexplained RPL (10, 11). The model of Lund, et al. is actually not suitable for individual risk assessment, as stated by the authors themselves (11). The model of Brigham, et al. has been implemented in RPL care in the Netherlands and the United Kingdom, (10, 12, 13). These studies however did not follow the nowadays recommended TRIPOD guideline in the development and reporting of the model (14). For example, neither of the studies were internally nor externally validated and this could influence the validity and performance of the model. Recently, we showed that the Brigham prediction model has poor performance in a Dutch RPL cohort, possibly due to a low number of patients included and a substantial change of the RPL population since 1999, in light of changes in defining unexplained RPL (15).

Most studies only concentrate on the first pregnancy after intake as primary outcome of the model, which lacks future perspective for couples with RPL. In addition, all earlier prediction models focused on the unexplained RPL population and on maternal predictors. None of them incorporated different causes for RPL, nor did they include paternal factors to establish a prediction specific to individual couples (16).

Individual couples with RPL now have an unclear prognosis of future success in terms of having a live birth. The aim of the current project is therefore to develop a prediction model that is able to provide tailormade estimations of pregnancy success in couples with both unexplained and explained RPL, and secondarily to develop a dynamic model that adjusts future chances based on pregnancies after intake.

## STUDY OBJECTIVES

### Primary objective

To predict the chance of a live birth within three years after intake in couples with unexplained RPL.

### Secondary objectives

To predict the chance of an ongoing pregnancy (>12 weeks) in the next pregnancy in couples with unexplained RPL.

To predict the chance of a complicated pregnancy in couples with unexplained RPL (preeclampsia, HELLP, eclampsia, gestational diabetes, gestational hypertension, preterm birth, low birth weight).

To predict the chance dynamically of a live birth given the outcome of a pregnancy after intake.

To predict the chance of above outcomes in couples with a known cause for RPL.

## METHODS AND ANALYSIS

### Study design

A multicenter hospital-based prospective and retrospective cohort study to develop a prediction model. This study has a total expected duration of 5 years (Figure 1).

### Eligibility criteria

Couples with the following criteria at intake visit will be included:

1. RPL in the current relationship: defined as the loss of  $\geq 2$  preceding pregnancies. These pregnancy losses include:

- All pregnancy losses before the 24th week of gestation verified by ultrasonography or uterine curettage and histology
- Non-visualized pregnancies (including biochemical pregnancy losses and/or resolved and treated pregnancies of unknown location), verified by positive urine or serum human chorionic gonadotropin (hCG)
- Both consecutive and non-consecutive pregnancy losses

2. Dutch or English speaking by either the male or the female of the couple

3. Couples with females aged  $\leq 42$  years

Couples will be excluded in case of mental or legal incapability of either male or female, or in case of  $< 2$  pregnancies in current relationship.

### Study population and recruitment

RPL couples that visit the RPL outpatient clinic of the Leiden University Medical Center (LUMC), or early pregnancy unit of the Erasmus University Medical Center (Erasmus MC) or Amsterdam University Medical Center (AUMC) will be assessed for eligibility. The LUMC is the coordinating center. After referral, couples will have an intake at one of the aforementioned centers, where they will be invited to participate in this study. If eligibility criteria are met, and in case of consent, couples will be selected for inclusion. In addition to this prospective inclusion of patients, couples

1  
2  
3 that have visited the aforementioned clinics between 2006 and 2021 will be included  
4 retrospectively.  
5

6 Couples will receive written information about both the prospective and retrospective cohort, and a  
7 concomitant informed consent form. The informed consent consists of a request to obtain data from  
8 their medical records for this study, together with a request to obtain data from other medical  
9 professionals in case pregnancies were monitored in other centers. Study information underlines  
10 that participation is voluntary, and that couples are free to withdraw from the study at any time  
11 point without any consequences.  
12  
13

## 14 Study procedures

15 General medical history, lifestyle data and obstetric history will be collected for all couples (see table  
16 1). Data will be collected during the initial intake visit. Uniformity in data collection between the  
17 participating centers will be ensured through templates. Digital surveys will be sent to participating  
18 couples to obtain additional data. All information will be stored in the electronic data capture  
19 software Castor EDC.  
20  
21  
22

23 Couples participating in the prospective cohort will be followed for a total of 5 years after initial visit.  
24 Annual questionnaires will be digitally sent to obtain data of new pregnancies and/or changes in  
25 health or lifestyle. If follow up has taken place in one of the participating centers, couples will not  
26 have to fill in these questionnaires, but data will rather be obtained during consultation. Couples  
27 participating in the retrospective cohort will receive an online questionnaire in case of missing data.  
28  
29

## 30 Control of bias

31 According to the PROBAST-tool (17), risk of bias in prediction model development studies can be  
32 divided into four domains: participants, predictors, outcome and analysis. Study population is clearly  
33 defined, minimizing selection bias in the participants domain. As clinicians in the participating  
34 centers perform intakes in a semi-standardized manner, predictors will be assessed in a similar way  
35 for all participants. The outcome is clearly defined and determined: urine or serum hCG  
36 measurement or heartbeat on ultrasound determine an ongoing pregnancy. To ensure that the  
37 analysis domain is not at risk of bias, the PROBAST-items of that domain will be followed. For the  
38 retrospective cohort, there is a risk of recall bias. Since intake visits are semi-structured, information  
39 at baseline is moderately similar across all inclusions. For additional information that has to be  
40 collected retrospectively, we aim to minimize recall bias by avoiding recall periods longer than five  
41 years.  
42  
43  
44  
45

## 46 Sample size calculation

47 The method of Riley et al. for the sample size calculation in prediction models is used (18). This  
48 method consists of four steps and four different sample sizes, after which the largest one is selected  
49 as the study sample size. The four steps ensure a precise estimate of the overall outcome risk,  
50 predicted values with a small mean error across all individuals, a small required shrinkage of  
51 predictor effects and a small optimism in apparent model fit. Using an anticipated outcome  
52 proportion of 0.65 (live birth), 12 predictor parameters, a shrinkage of 0.9 and an anticipated  $R^2_{cs}$  of  
53 0.1089, the largest sample size and thus this study's sample size is 931.  
54  
55  
56

## 57 Study outcomes

58 The following predictors were selected based on current literature, and will be assessed at intake (8,  
59 10, 11, 19-21):  
60

- Female age as a continuous variable
- Male age as a continuous variable
- Female BMI as a continuous variable
- Male BMI as a continuous variable
- Current female smoking as a categorical variable
- Current male smoking as a categorical variable
- Number of pregnancy losses as a categorical variable (2, 3, 4 and 5 or more)
- Heartbeat on ultrasound in obstetrical history as a binary variable
- ART in previous pregnancies as a binary variable
- Identification of an associated RPL factor as a binary variable

The following outcomes will be studied:

- Live birth within three years after initial intake visit (defined as the birth of a living child after 24 weeks gestation)
- Pregnancy outcomes since intake
- Time to pregnancy since intake
- Time between pregnancies since intake
- Pregnancy complications since intake

### Statistical analysis plan

For the primary outcome (live birth within three years after intake), we will develop a Cox proportional hazards model for time to pregnancy, including couples without full 3- or 5-year outcome information. For the secondary outcome, a logistic regression model for the binary outcome live birth in couples who conceived after their RPL intake will be developed. This will be used to dynamically predict live birth, given the outcome of pregnancies after intake

We will consider both simple linear and non-linear (restricted cubic splines) functions for continuous variables. The best fitting model is selected based on the Akaike Information Criterion which reflects the trade-off between information and model complexity (variable selection). Measurement of the AUC, the Brier score, the Brier skill score, and calibration of the model will be performed (Model performance). Internal validation will be performed using the bootstrapping method.

To cope with analysis of missing values (missing at random, missing completely at random), multiple imputation will be performed. Once the dataset is complete, cross validation of the previously selected variables will be performed, variables with a low predictive strength will be excluded.

External validation will be performed using data of Dutch academic hospitals which have not participated in this study.

### Patient and public involvement

The Dutch association for patients with fertility problems (Freya) was consulted during the development of the study protocol. Study information will be published on their website, and information on progress and results will be presented to patients during meetings organized by Freya.

Table 1. Collection of clinical characteristics

|        |                                                                                                                                                   |
|--------|---------------------------------------------------------------------------------------------------------------------------------------------------|
| Female | Date of birth, female age, alcohol consumption, smoking, caffeine intake, drugs intake, exercise pattern, education, BMI, blood pressure, general |
|--------|---------------------------------------------------------------------------------------------------------------------------------------------------|



|                   |                                                                                                                                                                                                                                                     |
|-------------------|-----------------------------------------------------------------------------------------------------------------------------------------------------------------------------------------------------------------------------------------------------|
|                   | medical history (hypertension, diabetes mellitus, surgeries, earlier blood transfusions), use of medication, ethnicity and family history.                                                                                                          |
| Male              | Date of birth, male age, alcohol consumption, smoking, caffeine intake, drugs intake, exercise pattern, education, BMI, general medical history (hypertension, diabetes mellitus, surgeries etc.), use of medication, ethnicity and family history. |
| Obstetric history | Parity, number of miscarriages, ectopic pregnancies or induced abortions, mode of conception, mode of delivery of previous births, gestational age at previous births, birth weight of children of previous births.                                 |
| RPL examination   | Presence of APL (anticardiolipin IgG and IgM, $\beta$ 2 glycoprotein I antibodies IgG and IgM, and lupus anticoagulant), presence of thyroid antibodies, parental chromosomal abnormalities and presence of congenital uterine anomalies.           |

## ETHICS AND DISSEMINATION

This study will be conducted according to the principles of the Declaration of Helsinki. The Medical Research Ethics Committee of the Leiden University Medical Center provided ethical approval for this study. There are no risks or burden involved in this study. All data will be collected during regular hospital visits or via questionnaires. Eligible couples will have sufficient time to decide on participating in this study, after having received written information. The Castor EDC database of the OPAL study will contain all clinical and survey data. This database will not include directly traceable patient data. The findings of this study will be disseminated via peer reviewed publications and presentations at international conferences.

## DISCUSSION

The perspective of a live birth is one of the most important aspects of RPL. Prognostic counselling plays a very important role in the RPL clinical practice, especially in the absence of an underlying risk factor and with the lack of treatment options. Different prognostic tools exist and are implicated in RPL care in the Netherlands and the United Kingdom, but these tools often are often of low quality [Youssef et al, submitted for Fertility and Sterility 2021].

In order to enable prediction of a live birth within three years or longer after initial intake visit, or to dynamically predict the chance of a live birth, a longer follow-up period is necessary. In this study proposal we will therefore include our patients not only prospectively, but also retrospectively. Retrospective inclusion is however known for recall bias. The initial intake visit is according to a semi-structured interview, thus minimizing differences between inclusion data across the retrospective cohort. In case of missing data, we will aim to minimize recall bias by avoiding recall periods longer than five years.

Another limitation of this study regards the predictors included in the model. There are various factors that are associated to RPL (such as sperm DNA fragmentation), that could possibly improve model performance, but we currently lack data to include these factors in a prediction model (22). Secondly, the predictor "identification of an associated RPL factor" does not specify the associated factor, something that would help counselling RPL couples. Of course, as there are several factors that could be categorized, the sample size needed for the inclusion of these factors would be much higher.

1  
2  
3 The ultimate goal of this study is therefore to accurately predict chances for future successful  
4 pregnancies, in order to aid expectation management, and provide a perspective for RPL couples.  
5 The outcomes of this study will provide tailor-made and individual prognostic assessments of live  
6 birth in couples with RPL, and will have to be externally validated to ensure generalizability.  
7  
8  
9  
10  
11  
12  
13  
14  
15  
16  
17  
18  
19  
20  
21  
22  
23  
24  
25  
26  
27  
28  
29  
30  
31  
32  
33  
34  
35  
36  
37  
38  
39  
40  
41  
42  
43  
44  
45  
46  
47  
48  
49  
50  
51  
52  
53  
54  
55  
56  
57  
58  
59  
60

For peer review only

## AUTHOR CONTRIBUTIONS

AY, EL and M-LvdH drafted the protocol. NvG and RvE contributed to the statistical analysis plan. All authors contributed to the writing and reviewing of this article and gave final approval of the version to be published.

## FUNDING STATEMENT

This research received no specific grant from any funding agency in the public, commercial or not-for-profit sectors

## COMPETING INTERESTS STATEMENT

No competing interests to declare

Word count: 2776

## REFERENCES

1. Bender Atik R, Christiansen OB, Elson J, Kolte AM, Lewis S, Middeldorp S, et al. ESHRE guideline: recurrent pregnancy loss. *Hum Reprod Open*. 2018;2018(2):hoy004.
2. Jauniaux E, Farquharson RG, Christiansen OB, Exalto N. Evidence-based guidelines for the investigation and medical treatment of recurrent miscarriage. *Human reproduction* (Oxford, England). 2006;21(9):2216-22.
3. Rai R, Regan L. Recurrent miscarriage. *Lancet*. 2006;368(9535):601-11.
4. McQueen DB, Zhang J, Robins JC. Sperm DNA fragmentation and recurrent pregnancy loss: a systematic review and meta-analysis. *Fertility and sterility*. 2019.
5. Nybo Andersen AM, Wohlfahrt J, Christens P, Olsen J, Melbye M. Maternal age and fetal loss: population based register linkage study. *BMJ (Clinical research ed)*. 2000;320(7251):1708-12.
6. Venners SA, Wang X, Chen C, Wang L, Chen D, Guang W, et al. Paternal smoking and pregnancy loss: a prospective study using a biomarker of pregnancy. *American journal of epidemiology*. 2004;159(10):993-1001.
7. Jaslow CR, Carney JL, Kutteh WH. Diagnostic factors identified in 1020 women with two versus three or more

1  
2  
3 recurrent pregnancy losses. Fertility and sterility.

4  
5  
6 2010;93(4):1234-43.

7  
8 8. Youssef A, Lashley L, Dieben S, Verburg H, van der  
9  
10 Hoorn ML. Defining recurrent pregnancy loss: associated  
11  
12 factors and prognosis in couples with two versus three or more  
13  
14 pregnancy losses. Reproductive biomedicine online.

15  
16  
17 2020;41(4):679-85.

18  
19 9. Liddell HS, Pattison NS, Zanderigo A. Recurrent  
20  
21 miscarriage--outcome after supportive care in early pregnancy.  
22  
23 The Australian & New Zealand journal of obstetrics &  
24  
25 gynaecology. 1991;31(4):320-2.

26  
27 10. Brigham SA, Conlon C, Farquharson RG. A longitudinal  
28  
29 study of pregnancy outcome following idiopathic recurrent  
30  
31 miscarriage. Human reproduction (Oxford, England).  
32  
33 1999;14(11):2868-71.

34  
35 11. Lund M, Kamper-Jorgensen M, Nielsen HS, Lidegaard O,  
36  
37 Andersen AM, Christiansen OB. Prognosis for live birth in  
38  
39 women with recurrent miscarriage: what is the best measure of  
40  
41 success? Obstetrics and gynecology. 2012;119(1):37-43.

42  
43 12. NVOG. Herhaalde Miskraam 2007 [08/06/2007:[Available  
44  
45 from: [www.nvog-](http://www.nvog-documenten.nl/richtlijn/doc/download.php?id=750)  
46  
47 [documenten.nl/richtlijn/doc/download.php?id=750](http://www.nvog-documenten.nl/richtlijn/doc/download.php?id=750).  
48  
49

50  
51 13. RCOG. The Investigation and Treatment of Couples with  
52  
53 Recurrent Firsttrimester and Second-trimester Miscarriage.  
54  
55 2011.  
56  
57  
58  
59  
60

- 1  
2  
3  
4 14. Collins GS, Reitsma JB, Altman DG, Moons KG.  
5  
6 Transparent reporting of a multivariable prediction model for  
7  
8 individual prognosis or diagnosis (TRIPOD): the TRIPOD  
9  
10 Statement. *BMC Med.* 2015;13:1.  
11  
12
- 13 15. Youssef A, van der Hoorn MLP, Dongen M, Visser J,  
14  
15 Bloemenkamp K, van Lith J, et al. External validation of a  
16  
17 frequently used prediction model for ongoing pregnancy in  
18  
19 couples with unexplained recurrent pregnancy loss. *Human  
20  
21 reproduction (Oxford, England).* 2021.  
22  
23
- 24 16. du Fosse NA, van der Hoorn MP, de Koning R, Mulders A,  
25  
26 van Lith JMM, le Cessie S, et al. Toward more accurate  
27  
28 prediction of future pregnancy outcome in couples with  
29  
30 unexplained recurrent pregnancy loss: taking both partners into  
31  
32 account. *Fertility and sterility.* 2022;117(1):144-52.  
33  
34
- 35 17. Moons KGM, Wolff RF, Riley RD, Whiting PF, Westwood  
36  
37 M, Collins GS, et al. PROBAST: A Tool to Assess Risk of Bias  
38  
39 and Applicability of Prediction Model Studies: Explanation and  
40  
41 Elaboration. *Ann Intern Med.* 2019;170(1):W1-W33.  
42  
43
- 44 18. Riley RD, Ensor J, Snell KIE, Harrell FE, Jr., Martin GP,  
45  
46 Reitsma JB, et al. Calculating the sample size required for  
47  
48 developing a clinical prediction model. *BMJ (Clinical research  
49  
50 ed).* 2020;368:m441.  
51  
52
- 53 19. du Fosse NA, Lashley E, van Beelen E, Meuleman T, le  
54  
55 Cessie S, van Lith JMM, et al. Identification of distinct seminal  
56  
57 plasma cytokine profiles associated with male age and lifestyle  
58  
59  
60

1  
2  
3  
4 characteristics in unexplained recurrent pregnancy loss.

5  
6 Journal of reproductive immunology. 2021;147:103349.

7  
8  
9 20. Sugiura-Ogasawara M, Ozaki Y, Kitaori T, Suzumori N,  
10 Obayashi S, Suzuki S. Live birth rate according to maternal age  
11 and previous number of recurrent miscarriages. American  
12 Journal of Reproductive Immunology. 2009;62(5):314-9.

13  
14  
15 21. Kling C, Magez J, Hedderich J, von Otte S, Kabelitz D.  
16 Two-year outcome after recurrent first trimester miscarriages:  
17 prognostic value of the past obstetric history. Archives of  
18 gynecology and obstetrics. 2016;293(5):1113-23.

19  
20  
21 22. du Fosse NA, van der Hoorn MP, van Lith JMM, le Cessie  
22 S, Lashley E. Advanced paternal age is associated with an  
23 increased risk of spontaneous miscarriage: a systematic review  
24 and meta-analysis. Human reproduction update.  
25 2020;26(5):650-69.  
26  
27  
28  
29  
30  
31  
32  
33  
34  
35  
36  
37  
38  
39  
40  
41  
42  
43  
44  
45  
46  
47  
48  
49  
50  
51  
52  
53  
54  
55  
56  
57  
58  
59  
60

Figure 1. Schematic diagram of study design

For peer review only



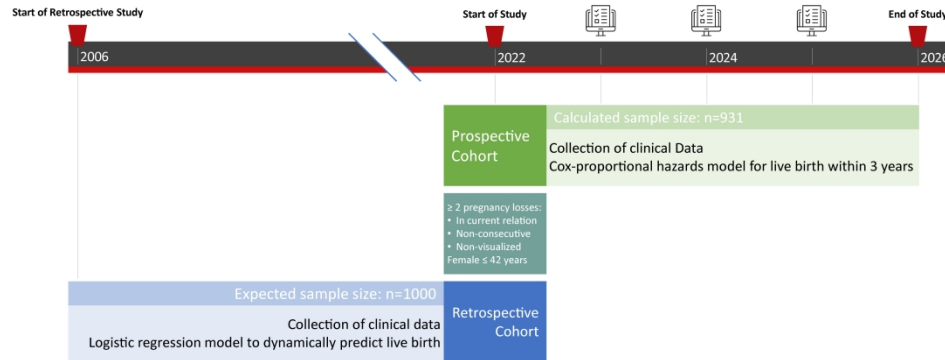

Figure 1. Schematic diagram of study design

We will include patients retrospectively from 2006 onwards and prospectively. For the latter group, the target for inclusion is 931 couples with RPL. Couples will receive a questionnaire each year during the follow up duration of 5 years, regarding their pregnancy results of that year, after which the medical records will be collected.

861x484mm (118 x 118 DPI)

# BMJ Open

## Development of the OPAL prediction model for prediction of live birth in couples with recurrent pregnancy loss: protocol for a prospective and retrospective cohort study in the Netherlands

|                                 |                                                                                                                                                                                                                                                                                                                                                                                                                                                                                                                                                                                                                                                                                                                                                                                                                                                                                                                                                                                                                                                                                                                                                                                                                                                                                                                                                                                                                                                  |
|---------------------------------|--------------------------------------------------------------------------------------------------------------------------------------------------------------------------------------------------------------------------------------------------------------------------------------------------------------------------------------------------------------------------------------------------------------------------------------------------------------------------------------------------------------------------------------------------------------------------------------------------------------------------------------------------------------------------------------------------------------------------------------------------------------------------------------------------------------------------------------------------------------------------------------------------------------------------------------------------------------------------------------------------------------------------------------------------------------------------------------------------------------------------------------------------------------------------------------------------------------------------------------------------------------------------------------------------------------------------------------------------------------------------------------------------------------------------------------------------|
| Journal:                        | <i>BMJ Open</i>                                                                                                                                                                                                                                                                                                                                                                                                                                                                                                                                                                                                                                                                                                                                                                                                                                                                                                                                                                                                                                                                                                                                                                                                                                                                                                                                                                                                                                  |
| Manuscript ID                   | bmjopen-2022-062402.R1                                                                                                                                                                                                                                                                                                                                                                                                                                                                                                                                                                                                                                                                                                                                                                                                                                                                                                                                                                                                                                                                                                                                                                                                                                                                                                                                                                                                                           |
| Article Type:                   | Protocol                                                                                                                                                                                                                                                                                                                                                                                                                                                                                                                                                                                                                                                                                                                                                                                                                                                                                                                                                                                                                                                                                                                                                                                                                                                                                                                                                                                                                                         |
| Date Submitted by the Author:   | 09-Aug-2022                                                                                                                                                                                                                                                                                                                                                                                                                                                                                                                                                                                                                                                                                                                                                                                                                                                                                                                                                                                                                                                                                                                                                                                                                                                                                                                                                                                                                                      |
| Complete List of Authors:       | <p>Youssef, Angelos; Leiden University Medical Center, Obstetrics and Gynaecology<br/> van der Hoorn, Marie-Louise; Leiden University Medical Center, Gynaecology and obstetrics<br/> van Eekelen, Rik; Amsterdam UMC Location AMC, Obstetrics and Gynaecology, Centre for Reproductive Medicine, Amsterdam Reproduction and Development Research Institute<br/> van Geloven, Nan; Leiden University Medical Center, Department of Biomedical Data Sciences<br/> van Wely, Madelon; Amsterdam UMC Location AMC, Obstetrics and Gynaecology, Centre for Reproductive Medicine, Amsterdam Reproduction and Development Research Institute, Amsterdam University Medical Centers, location Academic Medical Centre<br/> Smits, Myrthe A.J.; Amsterdam UMC Location AMC, Obstetrics and Gynaecology, Centre for Reproductive Medicine, Amsterdam Reproduction and Development Research Institute, Amsterdam University Medical Centers, location Academic Medical Centre<br/> Mulders, Annemarie; Erasmus Medical Center, Obstetrics and Gynaecology<br/> van Lith, Jan; Leiden University Medical Center, Obstetrics and Gynaecology<br/> Goddijn, Mariëtte; Amsterdam UMC Location AMC, Obstetrics and Gynaecology, Centre for Reproductive Medicine, Amsterdam Reproduction and Development Research Institute, Amsterdam University Medical Centers, location Academic Medical Centre<br/> Lashley, Eileen; Leiden University Medical Center</p> |
| <b>Primary Subject Heading</b>: | Obstetrics and gynaecology                                                                                                                                                                                                                                                                                                                                                                                                                                                                                                                                                                                                                                                                                                                                                                                                                                                                                                                                                                                                                                                                                                                                                                                                                                                                                                                                                                                                                       |
| Secondary Subject Heading:      | Research methods                                                                                                                                                                                                                                                                                                                                                                                                                                                                                                                                                                                                                                                                                                                                                                                                                                                                                                                                                                                                                                                                                                                                                                                                                                                                                                                                                                                                                                 |
| Keywords:                       | Reproductive medicine < GYNAECOLOGY, Maternal medicine < OBSTETRICS, EPIDEMIOLOGY                                                                                                                                                                                                                                                                                                                                                                                                                                                                                                                                                                                                                                                                                                                                                                                                                                                                                                                                                                                                                                                                                                                                                                                                                                                                                                                                                                |
|                                 |                                                                                                                                                                                                                                                                                                                                                                                                                                                                                                                                                                                                                                                                                                                                                                                                                                                                                                                                                                                                                                                                                                                                                                                                                                                                                                                                                                                                                                                  |

1  
2  
3  
4  
5  
6  
7  
8  
9  
10  
11  
12  
13  
14  
15  
16  
17  
18  
19  
20  
21  
22  
23  
24  
25  
26  
27  
28  
29  
30  
31  
32  
33  
34  
35  
36  
37  
38  
39  
40  
41  
42  
43  
44  
45  
46  
47  
48  
49  
50  
51  
52  
53  
54  
55  
56  
57  
58  
59  
60

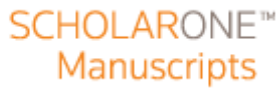

# Development of the OPAL prediction model for prediction of live birth in couples with recurrent pregnancy loss: protocol for a prospective and retrospective cohort study in the Netherlands

Angelos Youssef<sup>1,\*</sup>, Marie-Louise P. van der Hoorn<sup>1</sup>, Rik van Eekelen<sup>2</sup>, Nan van Geloven<sup>3</sup>, Madelon van Wely<sup>2</sup>, Myrthe A.J. Smits<sup>2</sup>, A.G.M.G.J. Mulders<sup>4</sup>, Jan M.M. van Lith<sup>1</sup>, Mariëtte Goddijn<sup>2</sup>, Eileen E.L.O. Lashley<sup>1</sup>

<sup>1</sup> Obstetrics and Gynaecology, Leiden University Medical Center, Netherlands

<sup>2</sup> Obstetrics and Gynaecology, Centre for Reproductive Medicine, Amsterdam Reproduction and Development Research Institute, Amsterdam University Medical Centers, location Academic Medical Centre, Amsterdam, Netherlands

<sup>3</sup> Biomedical Data Sciences, Leiden University Medical Center, Leiden, Netherlands

<sup>4</sup> Obstetrics and Gynaecology, Erasmus Medical Center, Netherlands

\*Correspondence to:

Angelos Youssef, Albinusdreef 2, 2333 ZA, Leiden, Netherlands

[A.Youssef@LUMC.nl](mailto:A.Youssef@LUMC.nl)

## ABSTRACT

### Introduction

Recurrent pregnancy loss (RPL) is defined as the loss of two or more conceptions before 24 weeks gestation. Despite extensive diagnostic work-up, in only 25-40% an underlying cause is identified. Several factors may increase the risk for miscarriage, but the chance of a successful pregnancy is still high. Prognostic counselling plays a significant role in supportive care. The main limitation in current prediction models is the lack of a sufficiently large cohort, adjustment for relevant risk factors, and separation between cumulative live birth rate and the success chance in the next conception. In this project, we aim to make an individualized prognosis for the future chance of pregnancy success which could lead to improved wellbeing and the ability managing reproductive choices.

### Methods and analysis

In this multicenter study, we will include both a prospective and a retrospective cohort of at least 931 and 1000 couples with RPL, respectively. Couples who have visited one of the three participating university hospitals in the Netherlands for intake are eligible for study participation, with a follow-up duration of 5 years. General medical and obstetric history and reports of pregnancies after the initial consultation will be collected. Multiple imputation will be performed to cope for missing data. A Cox proportional hazards model for time to pregnancy will be developed to estimate the cumulative chance of a live birth within three years after intake. To dynamically estimate the chance of an ongoing pregnancy, given the outcome of earlier pregnancies after intake, a logistic regression model will be developed.

### Ethics and dissemination

The Medical Ethical Research Committee of the Leiden University Medical Center approved this study protocol (N22.025). There are no risks or burden associated with this study. Participant written informed consent is required for both cohorts. Findings will be published in peer-reviewed journals and presentations at international conferences.

### Study registration number

ClinicalTrials.gov, NCT05167812.

### Keywords

Recurrent pregnancy loss, prediction model, prognostic tool

## ARTICLE SUMMARY

### Strengths and limitations of this study

- A prognostic model that estimates the chance of a live birth within three years in couples with recurrent pregnancy loss (RPL) will be developed using the Cox proportional hazards method.

- Logistic regression modelling enables dynamically updating live birth chances given the outcome of pregnancies after intake.
- A large cohort will be used for the development of a robust model, using the PROBAST tool as a guide to control bias.
- The retrospective cohort could be prone to response and recall bias.
- Primary prediction model will not be able to distinguish between different associated RPL factors.

## INTRODUCTION

Recurrent pregnancy loss (RPL) is defined as the loss of two or more conceptions before 24 weeks of gestation (1). This condition affects approximately 1-3% of all fertile couples (2, 3). RPL is a highly heterogeneous condition with multiple known maternal risk factors, varying from auto-immune diseases (antiphospholipid syndrome (APS), antithyroid antibodies), parental balanced chromosomal translocations and congenital uterine abnormalities to advanced maternal age, maternal smoking and alcohol consumption. Besides these maternal factors, a potential contribution of paternal factors (such as male age, lifestyle factors and DNA fragmentation) has been recognized to add to the risk for miscarriages (4-6).

Despite extensive diagnostic work-up offered to couples with RPL, underlying risk factors can be identified in only 25-40% of couples (7, 8). Limited understanding of mechanisms underlying RPL has the consequence that effective treatment options are often lacking. When no evidence-based therapeutic options are available for couples with RPL, clinical management is primarily focused on providing supportive care. Supportive care and intensive pregnancy surveillance in the first weeks of gestation are assumed to be of influence in the prevention of new pregnancy loss (9).

Part of this supportive care is counselling on the prognosis and live birth rate of subsequent pregnancies in couples with RPL. Recently we conducted a systematic search to identify and assess the methodological quality of existing prediction models (10). This review included the two most frequently used models which provide an estimate of subsequent chance of ongoing pregnancy/live birth in couples with unexplained RPL (11, 12). The model of Lund et al. is actually not suitable for individual risk assessment, as stated by the authors themselves (12). The model of Brigham et al. has been implemented in RPL care in the Netherlands and the United Kingdom (11, 13, 14). These studies however did not follow the nowadays recommended TRIPOD guideline in the development and reporting of the model (15). For example, neither of the models were internally nor externally validated and this could influence the validity and performance of the model. Recently, we showed that the Brigham prediction model has poor performance in a Dutch RPL cohort, possibly due to a low number of patients included and a substantial change of the RPL population since 1999, in light of changes in defining unexplained RPL (16).

Most studies only concentrate on the outcome of the first pregnancy after intake as primary outcome of the model, which lacks future perspective for couples with RPL. In addition, all earlier prediction models focused on the unexplained RPL population and on maternal predictors. None of them incorporated different causes for RPL, nor did they include paternal factors to establish a prediction specific to individual couples (17). Furthermore, obstetric complications after RPL are not part of these models (18, 19).

Individual couples with RPL now have an unclear prognosis of future success in terms of having a live birth. The aim of the current project is therefore to develop a prediction model that is able to provide tailormade estimates of pregnancy success in couples with both unexplained and explained RPL, and secondarily to develop a dynamic model that adjusts future chances based on pregnancies after intake.

## STUDY OBJECTIVES

### Primary objective

To predict the chance of a live birth within three years after intake in couples with unexplained RPL.

### Secondary objectives

To predict the chance of an ongoing pregnancy (>12 weeks) in the next pregnancy in couples with unexplained RPL.

To predict the chance of a complicated pregnancy in couples with unexplained RPL (preeclampsia, HELLP, eclampsia, gestational diabetes, gestational hypertension, preterm birth, low birth weight).

To predict the chance of a live birth dynamically given the outcome of a previous pregnancy after intake.

To predict the chance of above outcomes in couples with a known cause for RPL.

## METHODS AND ANALYSIS

### Study design

A multicenter hospital-based prospective and retrospective cohort study to develop a prediction model. This study has a total expected duration of 5 years (Figure 1).

### Eligibility criteria

Couples with the following criteria at intake visit will be included:

1. RPL in the current relationship: defined as the loss of  $\geq 2$  preceding pregnancies. These pregnancy losses include:

- All pregnancy losses before the 24th week of gestation verified by ultrasonography or uterine curettage and histology
- Non-visualized pregnancies (including biochemical pregnancy losses and/or resolved and treated pregnancies of unknown location), verified by positive urine or serum human chorionic gonadotropin (hCG)
- Both consecutive and non-consecutive pregnancy losses

2. Dutch or English speaking by either the male or the female of the couple

3. Couples with females aged  $\leq 42$  years

Couples will be excluded in case of mental or legal incapability of either male or female, or in case of  $< 2$  pregnancies in current relationship.

## Study population and recruitment

RPL couples that visit the RPL outpatient clinic of the Leiden University Medical Center (LUMC), or early pregnancy unit of the Erasmus University Medical Center (Erasmus MC) or Amsterdam University Medical Center (AUMC) will be assessed for eligibility. The LUMC is the coordinating center. After referral, couples will have an intake at one of the aforementioned centers, where they will be invited to participate in this study. If eligibility criteria are met, and in case of consent, couples will be selected for inclusion. In addition to this prospective inclusion of patients, couples that have visited the aforementioned clinics between 2006 and 2021 will be included retrospectively.

Couples will receive written information about both the prospective and retrospective cohort, and a concomitant informed consent form. The informed consent consists of a request to obtain data from their medical records for this study, together with a request to obtain data from other medical professionals in case pregnancies were monitored in other centers. Study information underlines that participation is voluntary, and that couples are free to withdraw from the study at any time point without any consequences.

Study inclusion started in April 2022 in the LUMC. The start of inclusions in other participating centers is pending. The estimated date of completion in each center is 5 years after the first inclusion.

## Study procedures

General medical history, lifestyle data and obstetric history will be collected for all couples (see table 1). Data will be collected during the initial intake visit. Uniformity in data collection between the participating centers will be ensured through templates. Digital surveys will be sent to participating couples to obtain additional data. All information will be stored in the electronic data capture software Castor EDC.

Couples participating in the prospective cohort will be followed for a total of 5 years after initial visit. Annual questionnaires will be digitally sent to obtain data of new pregnancies and/or changes in health or lifestyle. If follow up has taken place in one of the participating centers, couples will not have to fill in these questionnaires, but data will rather be obtained during consultation. Couples participating in the retrospective cohort will receive an online questionnaire in case of missing data.

**Table 1. Collection of clinical characteristics**

|                   |                                                                                                                                                                                                                                                                                              |
|-------------------|----------------------------------------------------------------------------------------------------------------------------------------------------------------------------------------------------------------------------------------------------------------------------------------------|
| Female            | Date of birth, female age, alcohol consumption, smoking, caffeine intake, drugs intake, exercise pattern, education, BMI, blood pressure, general medical history (hypertension, diabetes mellitus, surgeries, earlier blood transfusions), use of medication, ethnicity and family history. |
| Male              | Date of birth, male age, alcohol consumption, smoking, caffeine intake, drugs intake, exercise pattern, education, BMI, general medical history (hypertension, diabetes mellitus, surgeries etc.), use of medication, ethnicity and family history.                                          |
| Obstetric history | Parity, number of miscarriages, ectopic pregnancies or induced abortions, mode of conception, mode of delivery of previous births, gestational age at previous births, birth weight of children of previous births.                                                                          |
| RPL examination   | Presence of APL (anticardiolipin IgG and IgM, $\beta$ 2 glycoprotein I antibodies IgG and IgM, and lupus anticoagulant), thyroid function (thyroid stimulating                                                                                                                               |



|  |                                                                                                                                  |
|--|----------------------------------------------------------------------------------------------------------------------------------|
|  | hormone (TSH)), presence of thyroid antibodies, parental chromosomal abnormalities and presence of congenital uterine anomalies. |
|--|----------------------------------------------------------------------------------------------------------------------------------|

## Control of bias

According to the PROBAST-tool (20), risk of bias in prediction model development studies can be divided into four domains: participants, predictors, outcome and analysis. Study population is clearly defined, minimizing selection bias in the participants domain. As clinicians in the participating centers perform intakes in a semi-standardized manner, predictors will be assessed in a similar way for all participants. The outcome is clearly defined and determined: urine or serum hCG measurement or heartbeat on ultrasound determine an ongoing pregnancy. To ensure that the analysis domain is not at risk of bias, the PROBAST-items of that domain will be followed. For the retrospective cohort, there is a risk of recall bias. Since intake visits are semi-structured, information at baseline is moderately similar across all inclusions. For additional information that has to be collected retrospectively, we aim to minimize recall bias by avoiding recall periods longer than five years.

## Sample size calculation

The method of Riley et al. is used for the calculation of the required size in prediction models for the prospective cohort (21). This method consists of four steps and four different sample sizes, after which the largest one is selected as the study sample size. The four steps ensure a precise estimate of the overall outcome risk, predicted values with a small mean error across all individuals, a small required shrinkage of predictor effects and a small optimism in apparent model fit. Using an anticipated outcome proportion of 0.65 (live birth), 12 predictor parameters, a shrinkage of 0.9 and an anticipated  $R^2_{cs}$  of 0.1089, the largest sample size and thus this study's prospective cohort sample size is 931. The expected retrospective cohort size is 1000, based on a retrospective study period between 2006 and 2021 (approximately 200 patients per year for every participating center). This results in a minimum cohort size of 1931 RPL couples.

## Study outcomes

The following predictors were selected based on current literature, and will be assessed at intake (8, 11, 12, 22-24):

- Female age as a continuous variable
- Male age as a continuous variable
- Female BMI as a continuous variable
- Male BMI as a continuous variable
- Current female smoking as a categorical variable
- Current male smoking as a categorical variable
- Number of pregnancy losses as a categorical variable (2, 3, 4 and 5 or more)
- Heartbeat on ultrasound in obstetrical history as a binary variable
- ART in previous pregnancies as a binary variable
- Identification of an associated RPL factor as a binary variable

The following outcomes will be studied:

- Live birth within three years after initial intake visit (defined as the birth of a living child after 24 weeks gestation)

- Pregnancy outcomes since intake
- Time to pregnancy since intake
- Time between pregnancies since intake
- Pregnancy complications since intake, e.g.:
  - o Pre-eclampsia
  - o HELLP syndrome (Hemolysis, Elevated Liver enzymes, Low Platelets)
  - o Eclampsia
  - o Gestational diabetes
  - o Gestational hypertension
  - o Preterm birth
  - o Low birth weight

## Statistical analysis plan

For the primary objective (live birth within three years after intake), we will develop a Cox proportional hazards model for time to pregnancy, including couples without full 3- or 5-year outcome information. For the secondary objective, a logistic regression model for the binary outcome live birth in couples who conceived after their RPL intake will be developed. This will be used to dynamically predict live birth, given the outcome of pregnancies after intake

We will consider both simple linear and non-linear (restricted cubic splines) functions for continuous variables. The best fitting model is selected based on the Akaike Information Criterion which reflects the trade-off between information and model complexity (variable selection). Measurement of the AUC, the Brier score, and calibration of the model will be performed (Model performance). Internal validation will be performed using the bootstrapping method.

To cope with missing values (missing at random, missing completely at random), multiple imputation will be performed. Once the dataset is complete, cross validation of the previously selected variables will be performed, variables with a low predictive strength will be excluded.

External validation will be performed using data of hospitals which have not participated in this study.

## Patient and public involvement

The Dutch association for patients with fertility problems (Freya) was consulted during the development of the study protocol. Study information will be published on their website, and information on progress and results will be presented to patients during meetings organized by Freya.

## ETHICS AND DISSEMINATION

This study will be conducted according to the principles of the Declaration of Helsinki. The Medical Research Ethics Committee of the Leiden University Medical Center provided ethical approval for this study (N22.025). There are no risks or burden involved in this study. Participant informed consent will be required for both the prospective and retrospective cohort. All data will be collected during regular hospital visits or via questionnaires. Eligible couples will have sufficient time to decide on participating in this study, after having received written information. The Castor EDC database of the OPAL study will contain all clinical and survey data. This database will not include directly

1  
2  
3 traceable patient data. The findings of this study will be disseminated via peer reviewed publications  
4 and presentations at international conferences.  
5  
6

## 7 DISCUSSION

9 The perspective of a live birth is one of the most important aspects of RPL. Prognostic counselling  
10 plays a very important role in the RPL clinical practice, especially in the absence of an underlying risk  
11 factor and with the lack of treatment options. Different prognostic tools exist and are implicated in  
12 RPL care in the Netherlands and the United Kingdom, but these tools are often of low quality(10).  
13

14 In order to enable prediction of a live birth within three years after initial intake visit, or to  
15 dynamically predict the chance of a live birth, a long follow-up period is necessary. In this study  
16 proposal we will therefore include our patients not only prospectively, but also retrospectively.  
17 Retrospective inclusion is however prone to recall bias. The initial intake visit is according to a semi-  
18 structured interview, thus minimizing differences between data across the retrospective cohort. In  
19 case of missing data, we will aim to minimize recall bias by avoiding recall periods longer than five  
20 years.  
21  
22

23 Another limitation of this study regards the predictors included in the model. There are various  
24 factors that are associated to RPL (such as sperm DNA fragmentation), that could possibly improve  
25 model performance, but we currently lack data to include these factors in a prediction model (25).  
26 We intend to update the prediction model when new evidence suggests that these predictors should  
27 be included in the counselling of RPL couples. Secondly, the predictor "identification of an associated  
28 RPL factor" does not specify the associated factor, something that would help counselling RPL  
29 couples. Of course, as there are several factors that could be categorized, the sample size needed for  
30 the inclusion of these factors would be much higher.  
31  
32  
33

34 The ultimate goal of this study is to accurately predict outcomes of future pregnancies, in order to  
35 aid expectation management, and provide a perspective for RPL couples. The outcomes of this study  
36 will provide tailormade and individual prognostic assessments of live birth in couples with RPL, and  
37 will have to be externally validated to ensure generalizability.  
38  
39  
40  
41  
42  
43  
44  
45  
46  
47  
48  
49  
50  
51  
52  
53  
54  
55  
56  
57  
58  
59  
60

## Contributors

AY, EL and M-LvdH drafted the protocol. NvG and RvE contributed to the statistical analysis plan. All authors (AY, MG, EL, AM, MAJS, M-LvdH, RvE, NvG, JMMvL and MvW) contributed to the writing and reviewing of this article and gave final approval of the version to be published.

## Funding

This research received no specific grant from any funding agency in the public, commercial or not-for-profit sectors.

## Competing interests

No competing interests to declare.

## REFERENCES

1. The ESHRE Guideline Group on RPL, Bender Atik R, Christiansen OB, Elson J, Kolte AM, Lewis S, et al. ESHRE guideline: recurrent pregnancy loss. *Hum Reprod Open*. 2018;2018(2):hoy004.
2. Jauniaux E, Farquharson RG, Christiansen OB, Exalto N. Evidence-based guidelines for the investigation and medical treatment of recurrent miscarriage. *Human reproduction (Oxford, England)*. 2006;21(9):2216-22.
3. Rai R, Regan L. Recurrent miscarriage. *Lancet*. 2006;368(9535):601-11.
4. McQueen DB, Zhang J, Robins JC. Sperm DNA fragmentation and recurrent pregnancy loss: a systematic review and meta-analysis. *Fertility and sterility*. 2019.
5. Nybo Andersen AM, Wohlfahrt J, Christens P, Olsen J, Melbye M. Maternal age and fetal loss: population based register linkage study. *BMJ (Clinical research ed)*. 2000;320(7251):1708-12.
6. Venners SA, Wang X, Chen C, Wang L, Chen D, Guang W, et al. Paternal smoking and pregnancy loss: a prospective study using a biomarker of pregnancy. *American journal of epidemiology*. 2004;159(10):993-1001.
7. Jaslow CR, Carney JL, Kutteh WH. Diagnostic factors identified in 1020 women with two versus three or more

1  
2  
3 recurrent pregnancy losses. *Fertility and sterility*.

4  
5  
6 2010;93(4):1234-43.

7  
8 8. Youssef A, Lashley L, Dieben S, Verburg H, van der  
9  
10 Hoorn ML. Defining recurrent pregnancy loss: associated  
11  
12 factors and prognosis in couples with two versus three or more  
13  
14 pregnancy losses. *Reproductive biomedicine online*.

15  
16  
17 2020;41(4):679-85.

18  
19 9. Liddell HS, Pattison NS, Zanderigo A. Recurrent  
20  
21 miscarriage--outcome after supportive care in early pregnancy.  
22  
23 *The Australian & New Zealand journal of obstetrics &*  
24  
25 *gynaecology*. 1991;31(4):320-2.

26  
27 10. Youssef A, van der Hoorn MLP, van Lith JMM, van  
28  
29 Eekelen R, du Fosse NA, Lashley EELO. Prognosis in  
30  
31 unexplained recurrent pregnancy loss: a systematic review and  
32  
33 quality assessment of current clinical prediction models. *Fertility*  
34  
35 *& Sterility Reviews*. 2022;3(2):136-45.

36  
37 11. Brigham SA, Conlon C, Farquharson RG. A longitudinal  
38  
39 study of pregnancy outcome following idiopathic recurrent  
40  
41 miscarriage. *Human reproduction (Oxford, England)*.

42  
43  
44 1999;14(11):2868-71.  
45  
46 12. Lund M, Kamper-Jorgensen M, Nielsen HS, Lidegaard O,  
47  
48 Andersen AM, Christiansen OB. Prognosis for live birth in  
49  
50 women with recurrent miscarriage: what is the best measure of  
51  
52 success? *Obstetrics and gynecology*. 2012;119(1):37-43.  
53  
54  
55  
56  
57  
58  
59  
60

- 1  
2  
3  
4 13. NVOG. Herhaalde Miskraam 2007 [08/06/2007:[Available  
5 from: [www.nvog-  
7 documenten.nl/richtlijn/doc/download.php?id=750](http://www.nvog-<br/>6 documenten.nl/richtlijn/doc/download.php?id=750).  
8  
9  
10 14. RCOG. The Investigation and Treatment of Couples with  
11 Recurrent Firsttrimester and Second-trimester Miscarriage.  
12 2011.  
13  
14 15. Collins GS, Reitsma JB, Altman DG, Moons KG.  
15 Transparent reporting of a multivariable prediction model for  
16 individual prognosis or diagnosis (TRIPOD): the TRIPOD  
17 Statement. *BMC Med.* 2015;13:1.  
18  
19 16. Youssef A, van der Hoorn MLP, Dongen M, Visser J,  
20 Bloemenkamp K, van Lith J, et al. External validation of a  
21 frequently used prediction model for ongoing pregnancy in  
22 couples with unexplained recurrent pregnancy loss. *Human  
23 reproduction (Oxford, England)*. 2021.  
24  
25 17. du Fosse NA, van der Hoorn MP, de Koning R, Mulders A,  
26 van Lith JMM, le Cessie S, et al. Toward more accurate  
27 prediction of future pregnancy outcome in couples with  
28 unexplained recurrent pregnancy loss: taking both partners into  
29 account. *Fertility and sterility*. 2022;117(1):144-52.  
30  
31 18. Rasmark Roepke E, Christiansen OB, Kallen K, Hansson  
32 SR. Women with a History of Recurrent Pregnancy Loss Are a  
33 High-Risk Population for Adverse Obstetrical Outcome: A  
34 Retrospective Cohort Study. *J Clin Med*. 2021;10(2).  
35  
36  
37  
38  
39  
40  
41  
42  
43  
44  
45  
46  
47  
48  
49  
50  
51  
52  
53  
54  
55  
56  
57  
58  
59  
60

19. Ticconi C, Pietropolli A, Specchia M, Nicastrì E, Chiaramonte C, Piccione E, et al. Pregnancy-Related Complications in Women with Recurrent Pregnancy Loss: A Prospective Cohort Study. *J Clin Med*. 2020;9(9).
20. Moons KGM, Wolff RF, Riley RD, Whiting PF, Westwood M, Collins GS, et al. PROBAST: A Tool to Assess Risk of Bias and Applicability of Prediction Model Studies: Explanation and Elaboration. *Ann Intern Med*. 2019;170(1):W1-W33.
21. Riley RD, Ensor J, Snell KIE, Harrell FE, Jr., Martin GP, Reitsma JB, et al. Calculating the sample size required for developing a clinical prediction model. *BMJ (Clinical research ed)*. 2020;368:m441.
22. du Fosse NA, Lashley E, van Beelen E, Meuleman T, le Cessie S, van Lith JMM, et al. Identification of distinct seminal plasma cytokine profiles associated with male age and lifestyle characteristics in unexplained recurrent pregnancy loss. *Journal of reproductive immunology*. 2021;147:103349.
23. Sugiura-Ogasawara M, Ozaki Y, Kitaori T, Suzumori N, Obayashi S, Suzuki S. Live birth rate according to maternal age and previous number of recurrent miscarriages. *American Journal of Reproductive Immunology*. 2009;62(5):314-9.
24. Kling C, Magez J, Hedderich J, von Otte S, Kabelitz D. Two-year outcome after recurrent first trimester miscarriages: prognostic value of the past obstetric history. *Archives of gynecology and obstetrics*. 2016;293(5):1113-23.



1  
2  
3  
4 25. du Fosse NA, van der Hoorn MP, van Lith JMM, le Cessie  
5 S, Lashley E. Advanced paternal age is associated with an  
6 increased risk of spontaneous miscarriage: a systematic review  
7 and meta-analysis. Human reproduction update.  
8 2020;26(5):650-69.  
9  
10  
11  
12  
13  
14  
15  
16  
17  
18  
19  
20  
21  
22  
23  
24  
25  
26  
27  
28  
29  
30  
31  
32  
33  
34  
35  
36  
37  
38  
39  
40  
41  
42  
43  
44  
45  
46  
47  
48  
49  
50  
51  
52  
53  
54  
55  
56  
57  
58  
59  
60

For peer review only

1  
2  
3 **Figure 1. Schematic diagram of study design**  
4  
5  
6  
7  
8  
9  
10  
11  
12  
13  
14  
15  
16  
17  
18  
19  
20  
21  
22  
23  
24  
25  
26  
27  
28  
29  
30  
31  
32  
33  
34  
35  
36  
37  
38  
39  
40  
41  
42  
43  
44  
45  
46  
47  
48  
49  
50  
51  
52  
53  
54  
55  
56  
57  
58  
59  
60

For peer review only

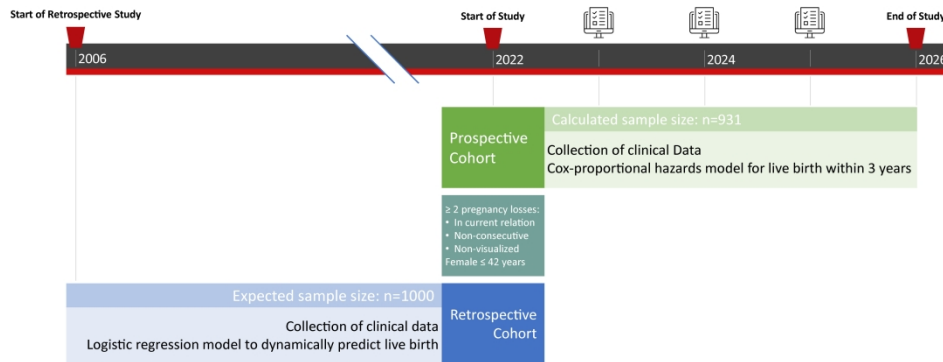

Figure 1. Schematic diagram of study design

We will include patients retrospectively from 2006 onwards and prospectively. For the latter group, the target for inclusion is 931 couples with RPL. Couples will receive a questionnaire each year during the follow up duration of 5 years, regarding their pregnancy results of that year, after which the medical records will be collected.

861x484mm (118 x 118 DPI)
